# Supplementary material for: Physiological and Metabolic Response of Arthrospira maxima to Organophosphates
Source: MDPI journal article supplement (doi:10.3390/microorganisms10051063), 2022-05-21
Supplement: s1 [file s1]

**Supplementary Table S1.** All biochemical data relating to the graphs inserted in the text:

**A)** Absorbance values of *A. maxima* samples taken every 7 days in two separate cultures for a period of 70 days

| Biomass Control up to 70 days (Abs 680 nm) |         |         |         |         |         |                 |         |
|--------------------------------------------|---------|---------|---------|---------|---------|-----------------|---------|
| Days of culture                            | repl. 1 | repl. 2 | repl. 3 | repl. 4 | repl. 5 | average control | SD      |
| 0                                          | 0.315   | 0.287   | 0.4     | 0.32    | 0.28    | 0.3204          | 0.03184 |
| 7                                          | 0.381   | 0.301   | 0.38    | 0.4     | 0.32    | 0.3564          | 0.03672 |
| 14                                         | 0.803   | 0.789   | 0.63    | 0.58    | 0.483   | 0.657           | 0.1112  |
| 21                                         | 0.96    | 0.893   | 0.78    | 0.69    | 0.73    | 0.8106          | 0.09272 |
| 28                                         | 1.2     | 1.03    | 0.981   | 1       | 1.1     | 1.0622          | 0.07024 |
| 35                                         | 0.93    | 0.83    | 0.732   | 0.89    | 0.9     | 0.8564          | 0.06032 |
| 42                                         | 0.51    | 0.6     | 0.581   | 0.65    | 0.75    | 0.6182          | 0.06544 |
| 49                                         | 0.351   | 0.42    | 0.38    | 0.32    | 0.43    | 0.3802          | 0.03584 |
| 56                                         | 0.298   | 0.301   | 0.3     | 0.28    | 0.31    | 0.2978          | 0.00712 |
| 63                                         | 0.328   | 0.338   | 0.48    | 0.39    | 0.42    | 0.3912          | 0.04704 |
| 70                                         | 0.684   | 0.593   | 0.73    | 0.63    | 0.73    | 0.6734          | 0.04952 |

**B)** Concentration values of Chl a in *A. maxima* samples taken every 7 days in two distinct cultures for a period of 42 days

| Chlorophyll a (mg/L) Control |         |         |         |         |          |                 |          |
|------------------------------|---------|---------|---------|---------|----------|-----------------|----------|
| Days of culture              | repl. 1 | repl. 2 | repl. 3 | repl. 4 | repl. 5  | average control | SD       |
| 0                            | 3.82093 | 2.71968 | 3.55491 | 3.82093 | 3.63093  | 3.509476        | 0.315918 |
| 7                            | 3.58749 | 2.71968 | 3.55491 | 3.82093 | 3.08749  | 3.3541          | 0.360412 |
| 14                           | 3.3501  | 3.51379 | 2.06048 | 2.5979  | 3.101    | 2.924654        | 0.476371 |
| 21                           | 3.3501  | 3.17644 | 3.4858  | 2.95613 | 2.785501 | 3.150794        | 0.223983 |
| 28                           | 4.2146  | 3.25887 | 2.75971 | 3.13359 | 3.3146   | 3.336274        | 0.35133  |
| 35                           | 2.16507 | 0.89836 | 1.08391 | 1.15949 | 1.865    | 1.434366        | 0.464535 |
| 42                           | 1.90612 | 2.32195 | 3.83124 | 1.67129 | 1.20612  | 2.187344        | 0.711401 |

**C)** Total carotenoid concentration values in *A. maxima* samples taken every 7 days in two distinct cultures for a period of 42 days

| Carotenoids (mg/L) Control |         |         |         |         |         |                 |         |
|----------------------------|---------|---------|---------|---------|---------|-----------------|---------|
| Days of culture            | repl. 1 | repl. 2 | repl. 3 | repl. 4 | repl. 5 | average control | SD      |
| 0                          | 1.244   | 0.972   | 1.348   | 1.436   | 1.01    | 1.202           | 0.1688  |
| 7                          | 1.244   | 0.972   | 1.348   | 1.436   | 1.1     | 1.22            | 0.1472  |
| 14                         | 1.176   | 1.28    | 0.852   | 0.976   | 0.92    | 1.0408          | 0.14976 |
| 21                         | 1.464   | 1.34    | 1.648   | 1.44    | 1.32    | 1.4424          | 0.09088 |
| 28                         | 2.132   | 2.216   | 1.588   | 1.728   | 1.83    | 1.8988          | 0.22016 |
| 35                         | 1.832   | 0.872   | 1.568   | 0.98    | 1.02    | 1.2544          | 0.35648 |
| 42                         | 1.28    | 1.784   | 2.26    | 1.516   | 1.351   | 1.6382          | 0.30704 |

**D)** Phycocyanin concentration values in *A. maxima* samples taken every 7 days in two separate cultures for a period of 42 days

**Supplementary Table S1.** All biochemical data relating to the graphs inserted in the text:

| Phycocyanin (mg/L) Control |          |          |          |          |          |                 |          |
|----------------------------|----------|----------|----------|----------|----------|-----------------|----------|
| Days of culture            | repl. 1  | repl. 2  | repl. 3  | repl. 4  | repl. 5  | average control | SD       |
| 0                          | 26.69738 | 13.19064 | 25.00225 | 15.95094 | 24.95356 | 21.15895        | 5.270532 |
| 7                          | 12.24195 | 21.41386 | 12.31124 | 24.1839  | 11.4236  | 16.31491        | 5.187176 |
| 14                         | 61.26704 | 36.2985  | 58.76667 | 46.54944 | 60.63933 | 52.70419        | 9.02418  |
| 21                         | 76.76442 | 38.02172 | 64.54345 | 42.50861 | 65.49925 | 57.46749        | 13.76186 |
| 28                         | 91.90225 | 48.95543 | 88.70899 | 50.5618  | 87.72397 | 73.57049        | 19.0495  |
| 35                         | 97.69888 | 48.16742 | 95.28502 | 50.60187 | 94.3     | 77.21064        | 22.26079 |
| 42                         | 49.13371 | 24.45094 | 61.06255 | 24.45094 | 55.17828 | 42.85528        | 14.72348 |

**E) Biomass values evaluated as absorbance of control samples**

| Biomass Control |         |         |         |         |         |                 |         |
|-----------------|---------|---------|---------|---------|---------|-----------------|---------|
| Days of culture | repl. 1 | repl. 2 | repl. 3 | repl. 4 | repl. 5 | average control | SD      |
| 0               | 0.327   | 0.296   | 0.395   | 0.331   | 0.304   | 0.3306          | 0.02592 |
| 7               | 0.374   | 0.297   | 0.403   | 0.396   | 0.317   | 0.3574          | 0.04032 |
| 14              | 0.792   | 0.757   | 0.703   | 0.602   | 0.508   | 0.6724          | 0.09392 |
| 21              | 1.03    | 0.982   | 0.752   | 0.701   | 0.694   | 0.8318          | 0.13936 |
| 28              | 1       | 1.15    | 0.932   | 1       | 1.1     | 1.0364          | 0.07088 |
| 35              | 0.897   | 0.795   | 0.727   | 0.889   | 0.932   | 0.848           | 0.0696  |
| 42              | 0.42    | 0.4     | 0.603   | 0.52    | 0.68    | 0.5246          | 0.09352 |

**F) Biomass values evaluated as absorbance of samples treated with 0.2 mM glyphosate**

| Biomass Gly    |         |         |         |         |         |         |         |
|----------------|---------|---------|---------|---------|---------|---------|---------|
| Treatment days | repl. 1 | repl. 2 | repl. 3 | repl. 4 | repl. 5 | average | SD      |
| 0              | 0.421   | 0.302   | 0.241   | 0.312   | 0.289   | 0.313   | 0.10664 |
| 7              | 0.568   | 0.601   | 0.498   | 0.578   | 0.502   | 0.5494  | 0.04064 |
| 14             | 0.517   | 0.603   | 0.501   | 0.585   | 0.523   | 0.5458  | 0.08576 |
| 21             | 0.291   | 0.301   | 0.321   | 0.268   | 0.279   | 0.292   | 0.01392 |
| 28             | 0.274   | 0.256   | 0.249   | 0.276   | 0.267   | 0.2644  | 0.01208 |
| 35             | 0.221   | 0.198   | 0.207   | 0.232   | 0.183   | 0.2082  | 0.01096 |
| 42             | 0.214   | 0.167   | 0.203   | 0.212   | 0.233   | 0.2058  | 0.01925 |

**G) Trend of the concentration of chlorophyll a in samples (repl. 1-5) of *A. maxima* cultures treated with 0.2 mM of glyphosate for 42 days and mean of the concentration values ( $\pm$  ES) of control samples**

| Chlorophyll a (mg/L) Gly |         |         |         |         |         |                 |         |                    |          |
|--------------------------|---------|---------|---------|---------|---------|-----------------|---------|--------------------|----------|
| Treatment days           | repl.1  | repl.2  | repl.3  | repl.4  | repl.5  | average control | SD      | average glyphosate | SD       |
| 0                        | 4.35451 | 3.98282 | 4.08927 | 3.85741 | 4.23614 | 3.509476        | 0.1688  | 4.10403            | 0.153036 |
| 7                        | 4.97834 | 4.21032 | 3.96214 | 4.35647 | 2.98563 | 3.3541          | 0.1472  | 4.09858            | 0.499756 |
| 14                       | 4.72346 | 3.98564 | 4.25691 | 3.12546 | 4.35698 | 2.924654        | 0.14976 | 4.08969            | 0.427312 |
| 21                       | 2.32652 | 2.10245 | 1.65893 | 2.23659 | 1.25698 | 3.150794        | 0.09088 | 1.916294           | 0.366671 |
| 28                       | 1.98517 | 1.56874 | 0.98546 | 1.65988 | 2.54681 | 3.336274        | 0.22016 | 1.749212           | 0.413422 |
| 35                       | 1.12495 | 0.92561 | 0.65846 | 1.54897 | 1.89546 | 1.434366        | 0.35648 | 1.23069            | 0.39322  |
| 42                       | 0.82556 | 0.65462 | 0.85694 | 0.98546 | 1.56478 | 2.187344        | 0.30704 | 0.977472           | 0.238118 |

**Supplementary Table S1.** All biochemical data relating to the graphs inserted in the text:

**H)** Dynamics of the concentration of carotenoids in samples (repl. 1-5) of *A. maxima* cultures treated with 0.2 mM of glyphosate for 42 days and mean of the concentration values ( $\pm$  ES) of control samples

| Carotenoids (mg/L) Gly |         |         |         |         |         |                 |         |                    |         |
|------------------------|---------|---------|---------|---------|---------|-----------------|---------|--------------------|---------|
| Treatment days         | repl. 1 | repl. 2 | repl. 3 | repl. 4 | repl. 5 | average control | SD      | average glyphosate | SD      |
| 0                      | 0.894   | 0.952   | 1.318   | 1.516   | 1.78    | 1.142           | 0.2     | 1.292              | 0.2952  |
| 7                      | 0.894   | 0.952   | 1.318   | 1.406   | 1.398   | 1.166           | 0.1808  | 1.1936             | 0.21648 |
| 14                     | 0.826   | 1.26    | 0.822   | 1.146   | 1.72    | 0.9868          | 0.12928 | 1.1548             | 0.26816 |
| 21                     | 1.114   | 1.32    | 1.618   | 1.623   | 1.454   | 1.3884          | 0.12448 | 1.4258             | 0.16704 |
| 28                     | 1.782   | 2.196   | 1.558   | 1.108   | 1.03    | 1.8448          | 0.16048 | 1.5348             | 0.37264 |
| 35                     | 1.482   | 0.852   | 1.538   | 1.98    | 1.92    | 1.2004          | 0.28768 | 1.5544             | 0.31648 |
| 42                     | 0.93    | 1.764   | 2.23    | 1.496   | 1.351   | 1.5842          | 0.37024 | 1.5542             | 0.35424 |

**I)** Trend of phycocyanin concentration in samples (repl. 1-5) of *A. maxima* cultures treated with 0.2 mM of glyphosate for 42 days and mean of the concentration values ( $\pm$  ES) of control samples

| Phycocyanin (mg/L) Gly |          |          |          |          |          |                 |          |                    |          |
|------------------------|----------|----------|----------|----------|----------|-----------------|----------|--------------------|----------|
| Treatment days         | repl. 1  | repl. 2  | repl. 3  | repl. 4  | repl. 5  | average control | SD       | average glyphosate | SD       |
| 0                      | 29.98764 | 21.08277 | 21.41461 | 24.03783 | 65.82397 | 21.15895        | 5.270532 | 32.46936           | 13.34184 |
| 7                      | 32.60412 | 16.74532 | 29.64906 | 19.70037 | 56.36704 | 16.31491        | 5.187176 | 31.01318           | 10.77792 |
| 14                     | 99.00075 | 22.65543 | 96.04569 | 25.61049 | 52.71536 | 52.70419        | 9.02418  | 59.20554           | 30.65414 |
| 21                     | 8.630337 | 4.826592 | 5.675281 | 7.781648 | 7.116105 | 57.46749        | 13.76186 | 6.805993           | 1.244045 |
| 28                     | 6.895131 | 5.516105 | 3.940075 | 8.471161 | 7.490637 | 73.57049        | 19.0495  | 6.462622           | 1.387625 |
| 35                     | 4.72809  | 3.743071 | 1.773034 | 6.698127 | 3.370787 | 77.21064        | 22.26079 | 4.062622           | 1.32039  |
| 42                     | 1.083521 | 0.591011 | 1.122472 | 3.546067 | 3.558052 | 42.85528        | 14.72348 | 1.980225           | 1.257468 |
