# Supplementary material for: Physiological and Metabolic Response of Arthrospira maxima to Organophosphates
Source: MDPI journal article supplement (doi:10.3390/microorganisms10051063), 2022-05-21
Supplement: s1 [file s1]

**Supplementary Table S4.** Heat map of Differentially Accumulated Proteins (DAP) in *A. maxima* samples from cultures treated with 0.2mM glyphosate versus expression levels of each protein in control samples.

XLSTAT 2021.3.1.1193 - Heat maps - Start time: 30/09/2021 at 15:34:26 / End time: 30/09/2021 at 15:34:31

Features/Individuals table: Workbook = Proteine Glifosato-1.xlsx / Sheet = spectral count / Range = 'spectral count'!\$H\$3:\$Z\$663 / 661 rows and 18 columns

Center: Yes

Reduce: Yes

Color scale: Red to green through black

Color calibration: Automatic(Min: -1 / Max: 1)

Seed (random numbers): 1966758294

Summary statistics:

| DAP Ids    | Observations | Obs. with missing data | Obs. without missing data | Minimum | Maximum | Mean  | Std. deviation |
|------------|--------------|------------------------|---------------------------|---------|---------|-------|----------------|
| AAQ63963.1 | 18           | 0                      | 18                        | 1.000   | 5.000   | 2.167 | 1.150          |
| AAX68410.1 | 18           | 0                      | 18                        | 1.000   | 6.000   | 1.889 | 1.530          |
| ABF61892.1 | 18           | 0                      | 18                        | 1.000   | 4.000   | 1.889 | 1.079          |
| ABV54998.1 | 18           | 0                      | 18                        | 0.000   | 3.000   | 1.667 | 0.907          |
| ALO44718.1 | 18           | 0                      | 18                        | 1.000   | 5.000   | 3.056 | 1.110          |
| ALO44744.1 | 18           | 0                      | 18                        | 1.000   | 3.000   | 1.611 | 0.778          |
| ALO44772.1 | 18           | 0                      | 18                        | 1.000   | 3.000   | 1.889 | 0.676          |
| ALO44782.1 | 18           | 0                      | 18                        | 1.000   | 3.000   | 1.500 | 0.786          |
| ALO44808.1 | 18           | 0                      | 18                        | 1.000   | 3.000   | 1.500 | 0.786          |
| ALO44826.1 | 18           | 0                      | 18                        | 1.000   | 5.000   | 2.278 | 1.406          |
| Y1         | 18           | 0                      | 18                        | 1.000   | 4.000   | 1.944 | 1.162          |
| ALO44907.1 | 18           | 0                      | 18                        | 1.000   | 3.000   | 1.500 | 0.786          |
| ALO44964.1 | 18           | 0                      | 18                        | 1.000   | 3.000   | 1.944 | 0.802          |
| ALO44998.1 | 18           | 0                      | 18                        | 1.000   | 4.000   | 2.111 | 1.023          |
| ALO45025.1 | 18           | 0                      | 18                        | 1.000   | 3.000   | 1.500 | 0.786          |
| ALO45039.1 | 18           | 0                      | 18                        | 0.000   | 5.000   | 1.500 | 1.098          |
| ALO45046.1 | 18           | 0                      | 18                        | 1.000   | 3.000   | 2.111 | 0.758          |
| ALO45052.1 | 18           | 0                      | 18                        | 1.000   | 4.000   | 1.500 | 0.857          |
| ALO45063.1 | 18           | 0                      | 18                        | 1.000   | 3.000   | 1.889 | 0.900          |
| ALO45068.1 | 18           | 0                      | 18                        | 1.000   | 4.000   | 1.667 | 0.840          |
| ALO45077.1 | 18           | 0                      | 18                        | 1.000   | 3.000   | 1.667 | 0.767          |
| ALO45091.1 | 18           | 0                      | 18                        | 2.000   | 6.000   | 3.722 | 1.018          |
| ALO45107.1 | 18           | 0                      | 18                        | 1.000   | 3.000   | 1.500 | 0.786          |
| ALO45119.1 | 18           | 0                      | 18                        | 1.000   | 3.000   | 2.278 | 0.752          |
| ALO45129.1 | 18           | 0                      | 18                        | 1.000   | 3.000   | 1.500 | 0.786          |
| ALO45161.1 | 18           | 0                      | 18                        | 1.000   | 4.000   | 2.056 | 1.162          |
| ALO45165.1 | 18           | 0                      | 18                        | 1.000   | 3.000   | 1.556 | 0.784          |
| ALO45202.1 | 18           | 0                      | 18                        | 1.000   | 4.000   | 1.500 | 0.857          |
| ALO45210.1 | 18           | 0                      | 18                        | 1.000   | 3.000   | 1.889 | 0.900          |
| ALO45219.1 | 18           | 0                      | 18                        | 1.000   | 4.000   | 2.278 | 0.895          |

|            |    |   |    |       |       |       |       |
|------------|----|---|----|-------|-------|-------|-------|
| ALO45224.1 | 18 | 0 | 18 | 1.000 | 4.000 | 2.278 | 0.895 |
| ALO45262.1 | 18 | 0 | 18 | 1.000 | 3.000 | 1.500 | 0.786 |
| ALO45265.1 | 18 | 0 | 18 | 1.000 | 4.000 | 1.611 | 0.850 |
| ALO45281.1 | 18 | 0 | 18 | 1.000 | 3.000 | 1.500 | 0.786 |
| ALO45310.1 | 18 | 0 | 18 | 1.000 | 3.000 | 1.833 | 0.857 |
| ALO45326.1 | 18 | 0 | 18 | 1.000 | 3.000 | 1.889 | 0.900 |
| ALO45355.1 | 18 | 0 | 18 | 1.000 | 3.000 | 1.889 | 0.900 |
| ALO45541.1 | 18 | 0 | 18 | 1.000 | 3.000 | 1.667 | 0.767 |
| ALO45547.1 | 18 | 0 | 18 | 1.000 | 3.000 | 1.667 | 0.767 |
| ALO45564.1 | 18 | 0 | 18 | 1.000 | 4.000 | 2.111 | 1.023 |
| ALO45583.1 | 18 | 0 | 18 | 1.000 | 3.000 | 1.500 | 0.786 |
| ALO45594.1 | 18 | 0 | 18 | 1.000 | 3.000 | 1.500 | 0.786 |
| ALO45639.1 | 18 | 0 | 18 | 1.000 | 5.000 | 1.500 | 1.043 |
| ALO45651.1 | 18 | 0 | 18 | 1.000 | 4.000 | 2.444 | 0.922 |
| ALO45685.1 | 18 | 0 | 18 | 1.000 | 4.000 | 2.056 | 0.873 |
| ALO45693.1 | 18 | 0 | 18 | 1.000 | 4.000 | 2.556 | 0.922 |
| ALO45702.1 | 18 | 0 | 18 | 1.000 | 3.000 | 1.500 | 0.786 |
| ALO45710.1 | 18 | 0 | 18 | 2.000 | 5.000 | 2.944 | 1.110 |
| ALO45739.1 | 18 | 0 | 18 | 1.000 | 3.000 | 1.500 | 0.786 |
| ALO45763.1 | 18 | 0 | 18 | 1.000 | 4.000 | 2.278 | 0.895 |
| ALO45819.1 | 18 | 0 | 18 | 1.000 | 4.000 | 1.944 | 1.110 |
| ALO45828.1 | 18 | 0 | 18 | 1.000 | 4.000 | 2.111 | 1.023 |
| ALO45858.1 | 18 | 0 | 18 | 1.000 | 3.000 | 1.889 | 0.900 |
| ALO45889.1 | 18 | 0 | 18 | 1.000 | 3.000 | 1.500 | 0.786 |
| ALO45920.1 | 18 | 0 | 18 | 1.000 | 3.000 | 2.056 | 0.802 |
| ALO45978.1 | 18 | 0 | 18 | 1.000 | 4.000 | 1.944 | 1.110 |
| ALO46022.1 | 18 | 0 | 18 | 1.000 | 3.000 | 2.222 | 0.878 |
| ALO46075.1 | 18 | 0 | 18 | 1.000 | 3.000 | 1.500 | 0.786 |
| ALO46090.1 | 18 | 0 | 18 | 1.000 | 6.000 | 2.944 | 1.349 |
| ALO46118.1 | 18 | 0 | 18 | 0.000 | 4.000 | 2.111 | 1.231 |
| ALO46158.1 | 18 | 0 | 18 | 1.000 | 3.000 | 1.667 | 0.767 |
| ALO46176.1 | 18 | 0 | 18 | 1.000 | 3.000 | 1.500 | 0.786 |
| ALO46207.1 | 18 | 0 | 18 | 1.000 | 3.000 | 1.667 | 0.767 |
| ALO46232.1 | 18 | 0 | 18 | 1.000 | 5.000 | 2.389 | 0.979 |
| ALO46243.1 | 18 | 0 | 18 | 1.000 | 4.000 | 1.500 | 0.857 |
| ALO46267.1 | 18 | 0 | 18 | 1.000 | 3.000 | 1.500 | 0.786 |
| ALO46318.1 | 18 | 0 | 18 | 1.000 | 3.000 | 1.444 | 0.784 |
| ALO46353.1 | 18 | 0 | 18 | 1.000 | 3.000 | 1.444 | 0.784 |
| ALO46369.1 | 18 | 0 | 18 | 1.000 | 4.000 | 1.944 | 1.110 |
| ALO46371.1 | 18 | 0 | 18 | 1.000 | 5.000 | 1.611 | 1.195 |
| ALO46420.1 | 18 | 0 | 18 | 1.000 | 3.000 | 1.444 | 0.784 |
| ALO46433.1 | 18 | 0 | 18 | 1.000 | 3.000 | 1.444 | 0.784 |
| ALO46441.1 | 18 | 0 | 18 | 1.000 | 4.000 | 2.278 | 0.895 |
| ALO46444.1 | 18 | 0 | 18 | 0.000 | 4.000 | 1.778 | 1.060 |
| ALO46492.1 | 18 | 0 | 18 | 1.000 | 5.000 | 2.611 | 1.461 |
| ALO46521.1 | 18 | 0 | 18 | 1.000 | 4.000 | 1.778 | 1.114 |
| ALO46529.1 | 18 | 0 | 18 | 1.000 | 4.000 | 1.944 | 1.110 |
| ALO46533.1 | 18 | 0 | 18 | 1.000 | 4.000 | 1.611 | 1.145 |
| ALO46586.1 | 18 | 0 | 18 | 0.000 | 4.000 | 2.056 | 0.998 |
| ALO46628.1 | 18 | 0 | 18 | 1.000 | 4.000 | 1.444 | 0.856 |
| ALO46673.1 | 18 | 0 | 18 | 0.000 | 4.000 | 1.444 | 0.922 |
| ALO46677.1 | 18 | 0 | 18 | 1.000 | 5.000 | 1.611 | 1.195 |
| ALO46683.1 | 18 | 0 | 18 | 1.000 | 4.000 | 1.944 | 1.110 |

|                  |    |   |    |       |       |       |       |
|------------------|----|---|----|-------|-------|-------|-------|
| ALO46685.1       | 18 | 0 | 18 | 1.000 | 3.000 | 1.444 | 0.784 |
| ALO46692.1       | 18 | 0 | 18 | 1.000 | 3.000 | 1.444 | 0.784 |
| ALO46739.1       | 18 | 0 | 18 | 1.000 | 4.000 | 2.278 | 0.895 |
| ALO46741.1       | 18 | 0 | 18 | 1.000 | 3.000 | 2.222 | 0.878 |
| ALO46882.1       | 18 | 0 | 18 | 1.000 | 3.000 | 1.889 | 0.900 |
| ALO46893.1       | 18 | 0 | 18 | 1.000 | 4.000 | 2.111 | 1.023 |
| ALO46899.1       | 18 | 0 | 18 | 1.000 | 4.000 | 1.889 | 0.963 |
| ALO46908.1       | 18 | 0 | 18 | 0.000 | 6.000 | 2.500 | 1.917 |
| ALO46909.1       | 18 | 0 | 18 | 0.000 | 4.000 | 2.111 | 1.079 |
| ALO46930.1       | 18 | 0 | 18 | 1.000 | 3.000 | 1.444 | 0.784 |
| ALO46935.1       | 18 | 0 | 18 | 1.000 | 3.000 | 1.444 | 0.784 |
| ALO47016.1       | 18 | 0 | 18 | 0.000 | 3.000 | 1.611 | 0.850 |
| ALO47031.1       | 18 | 0 | 18 | 0.000 | 4.000 | 1.389 | 0.916 |
| ALO47074.1       | 18 | 0 | 18 | 1.000 | 3.000 | 1.444 | 0.784 |
| ALO47092.1       | 18 | 0 | 18 | 1.000 | 3.000 | 1.444 | 0.784 |
| ALO47106.1       | 18 | 0 | 18 | 1.000 | 4.000 | 1.444 | 0.856 |
| ALO47109.1       | 18 | 0 | 18 | 1.000 | 3.000 | 1.611 | 0.778 |
| ALO47131.1       | 18 | 0 | 18 | 1.000 | 5.000 | 2.389 | 1.037 |
| ALO47132.1       | 18 | 0 | 18 | 1.000 | 3.000 | 1.611 | 0.778 |
| ALO47194.1       | 18 | 0 | 18 | 1.000 | 3.000 | 1.444 | 0.784 |
| ALO47225.1       | 18 | 0 | 18 | 1.000 | 4.000 | 2.278 | 0.895 |
| ALO47296.1       | 18 | 0 | 18 | 0.000 | 5.000 | 2.222 | 1.437 |
| ALO47299.1       | 18 | 0 | 18 | 1.000 | 5.000 | 1.833 | 1.295 |
| ALO47371.1       | 18 | 0 | 18 | 1.000 | 4.000 | 1.778 | 1.060 |
| ALO47378.1       | 18 | 0 | 18 | 0.000 | 3.000 | 1.444 | 0.922 |
| ALO47421.1       | 18 | 0 | 18 | 0.000 | 7.000 | 2.389 | 1.577 |
| ALO47433.1       | 18 | 0 | 18 | 1.000 | 6.000 | 3.333 | 1.455 |
| ALO47558.1       | 18 | 0 | 18 | 1.000 | 3.000 | 1.889 | 0.900 |
| ALO47582.1       | 18 | 0 | 18 | 1.000 | 3.000 | 1.611 | 0.778 |
| ALO47599.1       | 18 | 0 | 18 | 1.000 | 3.000 | 1.611 | 0.778 |
| ALO47614.1       | 18 | 0 | 18 | 1.000 | 5.000 | 1.778 | 1.517 |
| ALO47667.1       | 18 | 0 | 18 | 1.000 | 3.000 | 1.889 | 0.900 |
| AMW26778.1       | 18 | 0 | 18 | 1.000 | 3.000 | 1.611 | 0.778 |
| AMW26801.1       | 18 | 0 | 18 | 1.000 | 3.000 | 1.444 | 0.784 |
| AMW27306.1       | 18 | 0 | 18 | 1.000 | 3.000 | 1.889 | 0.900 |
| AMW27573.1 (+7)  | 18 | 0 | 18 | 1.000 | 3.000 | 1.444 | 0.784 |
| AMW28495.1       | 18 | 0 | 18 | 1.000 | 3.000 | 1.889 | 0.900 |
| AMW28500.1 (+8)  | 18 | 0 | 18 | 0.000 | 4.000 | 1.389 | 0.916 |
| AMW28956.1       | 18 | 0 | 18 | 0.000 | 5.000 | 1.778 | 1.215 |
| AMW29926.1       | 18 | 0 | 18 | 1.000 | 4.000 | 1.444 | 0.856 |
| AMW30968.1       | 18 | 0 | 18 | 1.000 | 6.000 | 1.778 | 1.555 |
| AMW31391.1       | 18 | 0 | 18 | 0.000 | 4.000 | 1.389 | 0.916 |
| BAI87888.1       | 18 | 0 | 18 | 1.000 | 6.000 | 2.444 | 1.653 |
| BAI88801.1       | 18 | 0 | 18 | 0.000 | 5.000 | 2.500 | 1.465 |
| CDM92508.1       | 18 | 0 | 18 | 1.000 | 3.000 | 1.611 | 0.778 |
| CDM94031.1 (+10) | 18 | 0 | 18 | 1.000 | 4.000 | 1.444 | 0.856 |
| CDM95413.1       | 18 | 0 | 18 | 1.000 | 3.000 | 1.611 | 0.778 |
| CDM95584.1       | 18 | 0 | 18 | 0.000 | 5.000 | 2.333 | 1.534 |
| CDM96902.1       | 18 | 0 | 18 | 0.000 | 5.000 | 1.889 | 1.183 |
| CDM96906.1       | 18 | 0 | 18 | 1.000 | 3.000 | 1.444 | 0.784 |
| EDZ92891.1       | 18 | 0 | 18 | 1.000 | 3.000 | 1.444 | 0.784 |
| EDZ94485.1       | 18 | 0 | 18 | 0.000 | 3.000 | 1.500 | 0.924 |
| EDZ95376.1       | 18 | 0 | 18 | 1.000 | 6.000 | 1.944 | 1.893 |

|            |    |   |    |       |       |       |       |
|------------|----|---|----|-------|-------|-------|-------|
| EKD05820.1 | 18 | 0 | 18 | 1.000 | 4.000 | 2.056 | 1.211 |
| EKD05876.1 | 18 | 0 | 18 | 1.000 | 4.000 | 2.056 | 1.211 |
| EKD06011.1 | 18 | 0 | 18 | 1.000 | 3.000 | 1.611 | 0.778 |
| EKD06063.1 | 18 | 0 | 18 | 1.000 | 3.000 | 1.889 | 0.900 |
| EKD06564.1 | 18 | 0 | 18 | 1.000 | 4.000 | 2.056 | 1.211 |
| EKD07239.1 | 18 | 0 | 18 | 1.000 | 4.000 | 1.611 | 1.145 |
| EKD07445.1 | 18 | 0 | 18 | 1.000 | 4.000 | 2.056 | 1.211 |
| EKD07734.1 | 18 | 0 | 18 | 2.000 | 4.000 | 2.722 | 0.752 |
| EKD08078.1 | 18 | 0 | 18 | 1.000 | 5.000 | 2.611 | 1.461 |
| EKD08222.1 | 18 | 0 | 18 | 1.000 | 3.000 | 1.611 | 0.778 |
| EKD08619.1 | 18 | 0 | 18 | 1.000 | 4.000 | 2.389 | 1.145 |
| EKD08754.1 | 18 | 0 | 18 | 1.000 | 3.000 | 1.444 | 0.784 |
| EKD09005.1 | 18 | 0 | 18 | 1.000 | 3.000 | 2.389 | 0.698 |
| EKD09207.1 | 18 | 0 | 18 | 1.000 | 4.000 | 2.056 | 1.211 |
| EKD09463.1 | 18 | 0 | 18 | 1.000 | 3.000 | 2.056 | 0.802 |
| EKD09492.1 | 18 | 0 | 18 | 1.000 | 4.000 | 2.111 | 1.132 |
| EKD09731.1 | 18 | 0 | 18 | 1.000 | 3.000 | 2.222 | 0.647 |
| EKD09794.1 | 18 | 0 | 18 | 1.000 | 5.000 | 1.944 | 1.474 |
| EKD09935.1 | 18 | 0 | 18 | 1.000 | 4.000 | 2.889 | 1.079 |
| EKD10098.1 | 18 | 0 | 18 | 1.000 | 3.000 | 1.611 | 0.778 |
| EKD10387.1 | 18 | 0 | 18 | 2.000 | 5.000 | 2.944 | 0.938 |
| EKD10398.1 | 18 | 0 | 18 | 1.000 | 3.000 | 1.444 | 0.784 |
| EKD10616.1 | 18 | 0 | 18 | 1.000 | 4.000 | 2.389 | 0.979 |
| EKD11263.1 | 18 | 0 | 18 | 1.000 | 4.000 | 1.444 | 0.856 |
| EKD11392.1 | 18 | 0 | 18 | 0.000 | 5.000 | 1.444 | 1.097 |
| EKD11399.1 | 18 | 0 | 18 | 0.000 | 4.000 | 2.056 | 1.211 |
| EKD11426.1 | 18 | 0 | 18 | 1.000 | 3.000 | 1.611 | 0.778 |
| EKD11459.1 | 18 | 0 | 18 | 1.000 | 3.000 | 1.889 | 0.900 |
| EKD11466.1 | 18 | 0 | 18 | 1.000 | 3.000 | 1.444 | 0.784 |
| EKD11562.1 | 18 | 0 | 18 | 1.000 | 4.000 | 2.222 | 1.114 |
| EKD11759.1 | 18 | 0 | 18 | 1.000 | 5.000 | 1.778 | 1.166 |
| GCE92103.1 | 18 | 0 | 18 | 0.000 | 7.000 | 3.000 | 1.940 |
| GCE92115.1 | 18 | 0 | 18 | 1.000 | 4.000 | 2.389 | 1.145 |
| GCE92151.1 | 18 | 0 | 18 | 0.000 | 7.000 | 3.778 | 2.390 |
| GCE92190.1 | 18 | 0 | 18 | 1.000 | 3.000 | 1.611 | 0.778 |
| GCE92236.1 | 18 | 0 | 18 | 1.000 | 5.000 | 2.778 | 1.437 |
| GCE92253.1 | 18 | 0 | 18 | 1.000 | 3.000 | 1.444 | 0.784 |
| GCE92273.1 | 18 | 0 | 18 | 1.000 | 4.000 | 1.944 | 1.211 |
| GCE92316.1 | 18 | 0 | 18 | 2.000 | 5.000 | 3.056 | 0.873 |
| GCE92329.1 | 18 | 0 | 18 | 1.000 | 3.000 | 1.444 | 0.784 |
| GCE92335.1 | 18 | 0 | 18 | 1.000 | 6.000 | 1.778 | 1.309 |
| GCE92360.1 | 18 | 0 | 18 | 1.000 | 6.000 | 1.778 | 1.555 |
| GCE92368.1 | 18 | 0 | 18 | 1.000 | 3.000 | 1.444 | 0.784 |
| GCE92370.1 | 18 | 0 | 18 | 1.000 | 5.000 | 1.611 | 1.195 |
| GCE92402.1 | 18 | 0 | 18 | 0.000 | 4.000 | 1.556 | 0.984 |
| GCE92418.1 | 18 | 0 | 18 | 1.000 | 4.000 | 1.778 | 1.114 |
| GCE92448.1 | 18 | 0 | 18 | 1.000 | 3.000 | 1.611 | 0.778 |
| GCE92453.1 | 18 | 0 | 18 | 1.000 | 3.000 | 1.889 | 0.900 |
| GCE92484.1 | 18 | 0 | 18 | 1.000 | 3.000 | 1.444 | 0.784 |
| GCE92487.1 | 18 | 0 | 18 | 1.000 | 3.000 | 1.444 | 0.784 |
| GCE92501.1 | 18 | 0 | 18 | 0.000 | 5.000 | 2.833 | 1.339 |
| GCE92520.1 | 18 | 0 | 18 | 1.000 | 3.000 | 1.444 | 0.784 |
| GCE92583.1 | 18 | 0 | 18 | 1.000 | 3.000 | 1.444 | 0.784 |

|            |    |   |    |        |       |       |       |
|------------|----|---|----|--------|-------|-------|-------|
| GCE92614.1 | 18 | 0 | 18 | 1.000  | 4.000 | 1.611 | 1.145 |
| GCE92711.1 | 18 | 0 | 18 | 1.000  | 3.000 | 1.444 | 0.784 |
| GCE92766.1 | 18 | 0 | 18 | 0.000  | 5.000 | 1.389 | 1.145 |
| GCE92821.1 | 18 | 0 | 18 | 1.000  | 3.000 | 1.611 | 0.778 |
| GCE92851.1 | 18 | 0 | 18 | 1.000  | 3.000 | 1.611 | 0.778 |
| GCE92904.1 | 18 | 0 | 18 | 1.000  | 3.000 | 1.444 | 0.784 |
| GCE92978.1 | 18 | 0 | 18 | 1.000  | 4.000 | 2.222 | 1.114 |
| GCE92987.1 | 18 | 0 | 18 | 1.000  | 3.000 | 1.444 | 0.784 |
| GCE92993.1 | 18 | 0 | 18 | -1.000 | 5.000 | 2.222 | 1.700 |
| GCE93014.1 | 18 | 0 | 18 | 0.000  | 4.000 | 2.056 | 1.259 |
| GCE93062.1 | 18 | 0 | 18 | 0.000  | 6.000 | 1.833 | 1.425 |
| GCE93126.1 | 18 | 0 | 18 | 0.000  | 6.000 | 2.278 | 1.994 |
| GCE93164.1 | 18 | 0 | 18 | 1.000  | 4.000 | 1.778 | 1.114 |
| GCE93203.1 | 18 | 0 | 18 | 1.000  | 4.000 | 2.056 | 1.211 |
| GCE93215.1 | 18 | 0 | 18 | 1.000  | 5.000 | 2.167 | 1.150 |
| GCE93244.1 | 18 | 0 | 18 | 1.000  | 4.000 | 2.056 | 1.211 |
| GCE93275.1 | 18 | 0 | 18 | 1.000  | 4.000 | 1.611 | 1.145 |
| GCE93280.1 | 18 | 0 | 18 | 1.000  | 3.000 | 1.444 | 0.784 |
| GCE93320.1 | 18 | 0 | 18 | 0.000  | 5.000 | 1.389 | 1.145 |
| GCE93333.1 | 18 | 0 | 18 | 1.000  | 5.000 | 1.833 | 1.295 |
| GCE93338.1 | 18 | 0 | 18 | 0.000  | 7.000 | 3.333 | 1.879 |
| GCE93348.1 | 18 | 0 | 18 | 1.000  | 3.000 | 1.611 | 0.778 |
| GCE93388.1 | 18 | 0 | 18 | 1.000  | 5.000 | 2.444 | 1.580 |
| GCE93416.1 | 18 | 0 | 18 | 1.000  | 3.000 | 1.444 | 0.784 |
| GCE93438.1 | 18 | 0 | 18 | 1.000  | 3.000 | 1.611 | 0.778 |
| GCE93452.1 | 18 | 0 | 18 | 0.000  | 5.000 | 3.000 | 1.495 |
| GCE93470.1 | 18 | 0 | 18 | 0.000  | 4.000 | 1.389 | 0.916 |
| GCE93483.1 | 18 | 0 | 18 | 0.000  | 5.000 | 2.667 | 1.372 |
| GCE93494.1 | 18 | 0 | 18 | 0.000  | 8.000 | 4.778 | 2.669 |
| GCE93544.1 | 18 | 0 | 18 | 1.000  | 4.000 | 2.222 | 1.114 |
| GCE93558.1 | 18 | 0 | 18 | 1.000  | 3.000 | 1.444 | 0.784 |
| GCE93593.1 | 18 | 0 | 18 | 1.000  | 3.000 | 1.889 | 0.900 |
| GCE93639.1 | 18 | 0 | 18 | 0.000  | 5.000 | 2.333 | 1.534 |
| GCE93641.1 | 18 | 0 | 18 | 1.000  | 4.000 | 1.944 | 1.110 |
| GCE93654.1 | 18 | 0 | 18 | 0.000  | 6.000 | 1.778 | 1.353 |
| GCE93707.1 | 18 | 0 | 18 | 1.000  | 3.000 | 1.444 | 0.784 |
| GCE93709.1 | 18 | 0 | 18 | 1.000  | 4.000 | 2.056 | 1.211 |
| GCE93727.1 | 18 | 0 | 18 | 1.000  | 3.000 | 1.944 | 0.873 |
| GCE93729.1 | 18 | 0 | 18 | 0.000  | 5.000 | 2.778 | 1.309 |
| GCE93773.1 | 18 | 0 | 18 | 1.000  | 3.000 | 1.889 | 0.900 |
| GCE93780.1 | 18 | 0 | 18 | 1.000  | 4.000 | 1.611 | 0.850 |
| GCE93839.1 | 18 | 0 | 18 | 1.000  | 4.000 | 1.444 | 0.856 |
| GCE93947.1 | 18 | 0 | 18 | 1.000  | 5.000 | 1.444 | 1.042 |
| GCE93984.1 | 18 | 0 | 18 | 0.000  | 3.000 | 1.389 | 0.850 |
| GCE93998.1 | 18 | 0 | 18 | 0.000  | 7.000 | 2.111 | 1.676 |
| GCE94007.1 | 18 | 0 | 18 | 1.000  | 4.000 | 2.056 | 0.873 |
| GCE94103.1 | 18 | 0 | 18 | 1.000  | 6.000 | 2.278 | 1.565 |
| GCE94186.1 | 18 | 0 | 18 | 1.000  | 3.000 | 1.444 | 0.784 |
| GCE94196.1 | 18 | 0 | 18 | 1.000  | 4.000 | 2.556 | 0.984 |
| GCE94237.1 | 18 | 0 | 18 | 1.000  | 5.000 | 2.833 | 1.295 |
| GCE94250.1 | 18 | 0 | 18 | 1.000  | 3.000 | 1.611 | 0.778 |
| GCE94252.1 | 18 | 0 | 18 | 1.000  | 4.000 | 1.444 | 0.856 |
| GCE94284.1 | 18 | 0 | 18 | 1.000  | 4.000 | 1.778 | 1.060 |

|            |    |   |    |       |       |       |       |
|------------|----|---|----|-------|-------|-------|-------|
| GCE94322.1 | 18 | 0 | 18 | 1.000 | 4.000 | 2.111 | 0.963 |
| GCE94353.1 | 18 | 0 | 18 | 1.000 | 4.000 | 1.778 | 0.808 |
| GCE94359.1 | 18 | 0 | 18 | 1.000 | 5.000 | 2.778 | 1.437 |
| GCE94368.1 | 18 | 0 | 18 | 1.000 | 5.000 | 1.778 | 1.166 |
| GCE94464.1 | 18 | 0 | 18 | 1.000 | 4.000 | 1.611 | 0.850 |
| GCE94471.1 | 18 | 0 | 18 | 1.000 | 4.000 | 2.278 | 1.074 |
| GCE94488.1 | 18 | 0 | 18 | 1.000 | 4.000 | 2.056 | 1.211 |
| GCE94500.1 | 18 | 0 | 18 | 1.000 | 3.000 | 1.444 | 0.784 |
| GCE94522.1 | 18 | 0 | 18 | 0.000 | 5.000 | 2.056 | 1.305 |
| GCE94563.1 | 18 | 0 | 18 | 1.000 | 3.000 | 1.611 | 0.778 |
| GCE94569.1 | 18 | 0 | 18 | 1.000 | 3.000 | 1.444 | 0.784 |
| GCE94610.1 | 18 | 0 | 18 | 1.000 | 3.000 | 1.444 | 0.784 |
| GCE94615.1 | 18 | 0 | 18 | 2.000 | 5.000 | 3.444 | 0.922 |
| GCE94620.1 | 18 | 0 | 18 | 1.000 | 3.000 | 1.444 | 0.784 |
| GCE94644.1 | 18 | 0 | 18 | 1.000 | 6.000 | 3.278 | 1.873 |
| GCE94651.1 | 18 | 0 | 18 | 1.000 | 3.000 | 1.444 | 0.784 |
| GCE94674.1 | 18 | 0 | 18 | 1.000 | 5.000 | 1.444 | 1.042 |
| GCE94745.1 | 18 | 0 | 18 | 1.000 | 4.000 | 2.056 | 1.211 |
| GCE94802.1 | 18 | 0 | 18 | 1.000 | 3.000 | 1.611 | 0.778 |
| GCE94810.1 | 18 | 0 | 18 | 1.000 | 3.000 | 1.444 | 0.784 |
| GCE94891.1 | 18 | 0 | 18 | 0.000 | 6.000 | 2.444 | 1.917 |
| GCE94908.1 | 18 | 0 | 18 | 1.000 | 7.000 | 3.778 | 1.927 |
| GCE94920.1 | 18 | 0 | 18 | 1.000 | 3.000 | 1.444 | 0.784 |
| GCE94922.1 | 18 | 0 | 18 | 1.000 | 3.000 | 1.611 | 0.778 |
| GCE94942.1 | 18 | 0 | 18 | 1.000 | 5.000 | 1.778 | 1.166 |
| GCE94979.1 | 18 | 0 | 18 | 1.000 | 3.000 | 1.778 | 0.943 |
| GCE94993.1 | 18 | 0 | 18 | 1.000 | 4.000 | 2.111 | 1.023 |
| GCE95008.1 | 18 | 0 | 18 | 0.000 | 4.000 | 2.389 | 1.195 |
| GCE95043.1 | 18 | 0 | 18 | 0.000 | 5.000 | 1.444 | 1.097 |
| GCE95050.1 | 18 | 0 | 18 | 1.000 | 3.000 | 1.444 | 0.784 |
| GCE95054.1 | 18 | 0 | 18 | 1.000 | 4.000 | 1.722 | 0.958 |
| GCE95099.1 | 18 | 0 | 18 | 1.000 | 3.000 | 1.500 | 0.786 |
| GCE95127.1 | 18 | 0 | 18 | 1.000 | 4.000 | 1.500 | 0.857 |
| GCE95132.1 | 18 | 0 | 18 | 0.000 | 3.000 | 1.444 | 0.856 |
| GCE95143.1 | 18 | 0 | 18 | 0.000 | 3.000 | 1.500 | 0.924 |
| GCE95152.1 | 18 | 0 | 18 | 1.000 | 3.000 | 1.444 | 0.784 |
| GCE95183.1 | 18 | 0 | 18 | 1.000 | 3.000 | 1.611 | 0.778 |
| GCE95191.1 | 18 | 0 | 18 | 1.000 | 3.000 | 1.444 | 0.784 |
| GCE95263.1 | 18 | 0 | 18 | 1.000 | 3.000 | 1.444 | 0.784 |
| GCE95294.1 | 18 | 0 | 18 | 1.000 | 3.000 | 1.889 | 0.900 |
| GCE95330.1 | 18 | 0 | 18 | 1.000 | 4.000 | 1.611 | 1.145 |
| GCE95372.1 | 18 | 0 | 18 | 1.000 | 4.000 | 2.056 | 1.211 |
| GCE95385.1 | 18 | 0 | 18 | 1.000 | 3.000 | 1.889 | 0.900 |
| GCE95474.1 | 18 | 0 | 18 | 1.000 | 3.000 | 1.778 | 0.943 |
| GCE95485.1 | 18 | 0 | 18 | 1.000 | 4.000 | 2.389 | 0.979 |
| GCE95511.1 | 18 | 0 | 18 | 1.000 | 3.000 | 1.444 | 0.784 |
| GCE95530.1 | 18 | 0 | 18 | 1.000 | 4.000 | 2.056 | 1.162 |
| GCE95540.1 | 18 | 0 | 18 | 1.000 | 3.000 | 1.611 | 0.778 |
| GCE95558.1 | 18 | 0 | 18 | 1.000 | 4.000 | 2.056 | 1.211 |
| GCE95584.1 | 18 | 0 | 18 | 1.000 | 3.000 | 1.444 | 0.784 |
| GCE95600.1 | 18 | 0 | 18 | 1.000 | 3.000 | 1.944 | 0.873 |
| GCE95614.1 | 18 | 0 | 18 | 1.000 | 3.000 | 1.444 | 0.784 |
| GCE95660.1 | 18 | 0 | 18 | 1.000 | 4.000 | 1.778 | 1.114 |

|                 |    |   |    |       |       |       |       |
|-----------------|----|---|----|-------|-------|-------|-------|
| GCE95770.1      | 18 | 0 | 18 | 1.000 | 4.000 | 2.056 | 1.211 |
| GCE95775.1      | 18 | 0 | 18 | 1.000 | 4.000 | 2.389 | 0.979 |
| GCE95812.1      | 18 | 0 | 18 | 1.000 | 3.000 | 1.444 | 0.784 |
| GCE95860.1      | 18 | 0 | 18 | 1.000 | 3.000 | 2.056 | 0.802 |
| GCE95868.1      | 18 | 0 | 18 | 1.000 | 4.000 | 2.389 | 0.979 |
| GCE95897.1      | 18 | 0 | 18 | 1.000 | 3.000 | 1.611 | 0.778 |
| GCE95909.1      | 18 | 0 | 18 | 1.000 | 6.000 | 3.278 | 1.873 |
| GCE95975.1      | 18 | 0 | 18 | 1.000 | 3.000 | 1.444 | 0.784 |
| GCE95992.1      | 18 | 0 | 18 | 1.000 | 3.000 | 1.444 | 0.784 |
| GCE96000.1      | 18 | 0 | 18 | 1.000 | 4.000 | 2.222 | 1.114 |
| GCE96021.1      | 18 | 0 | 18 | 1.000 | 4.000 | 2.056 | 1.211 |
| GCE96028.1      | 18 | 0 | 18 | 1.000 | 3.000 | 1.611 | 0.778 |
| GCE96032.1      | 18 | 0 | 18 | 1.000 | 3.000 | 1.444 | 0.784 |
| GCE96053.1      | 18 | 0 | 18 | 1.000 | 3.000 | 1.444 | 0.784 |
| GCE96060.1      | 18 | 0 | 18 | 1.000 | 4.000 | 2.222 | 1.060 |
| GCE96070.1      | 18 | 0 | 18 | 1.000 | 4.000 | 1.444 | 0.856 |
| GCE96111.1      | 18 | 0 | 18 | 1.000 | 3.000 | 1.444 | 0.784 |
| GCE96129.1      | 18 | 0 | 18 | 1.000 | 3.000 | 1.611 | 0.778 |
| GCE96183.1      | 18 | 0 | 18 | 1.000 | 3.000 | 1.444 | 0.784 |
| GCE96189.1      | 18 | 0 | 18 | 1.000 | 3.000 | 1.611 | 0.778 |
| GCE96222.1      | 18 | 0 | 18 | 1.000 | 3.000 | 1.444 | 0.784 |
| GCE96231.1      | 18 | 0 | 18 | 1.000 | 4.000 | 1.611 | 1.145 |
| GCE96253.1      | 18 | 0 | 18 | 1.000 | 4.000 | 1.778 | 1.114 |
| GCE96260.1      | 18 | 0 | 18 | 1.000 | 3.000 | 1.444 | 0.784 |
| GCE96268.1      | 18 | 0 | 18 | 1.000 | 3.000 | 1.444 | 0.784 |
| GCE96273.1      | 18 | 0 | 18 | 1.000 | 3.000 | 1.944 | 0.873 |
| GCE96311.1      | 18 | 0 | 18 | 1.000 | 3.000 | 1.611 | 0.778 |
| GCE96312.1      | 18 | 0 | 18 | 1.000 | 7.000 | 2.278 | 1.809 |
| GCE96346.1      | 18 | 0 | 18 | 1.000 | 5.000 | 1.944 | 1.259 |
| GCE96360.1      | 18 | 0 | 18 | 1.000 | 4.000 | 2.056 | 1.211 |
| GCE96373.1      | 18 | 0 | 18 | 1.000 | 4.000 | 2.556 | 0.984 |
| GCE96397.1      | 18 | 0 | 18 | 1.000 | 6.000 | 2.111 | 1.844 |
| GCE96404.1      | 18 | 0 | 18 | 1.000 | 4.000 | 2.056 | 1.211 |
| GCE96417.1      | 18 | 0 | 18 | 1.000 | 3.000 | 1.889 | 0.900 |
| GCE96437.1      | 18 | 0 | 18 | 1.000 | 3.000 | 1.611 | 0.778 |
| GCE96452.1      | 18 | 0 | 18 | 1.000 | 3.000 | 1.444 | 0.784 |
| GCE96527.1      | 18 | 0 | 18 | 1.000 | 3.000 | 1.444 | 0.784 |
| GCE96541.1      | 18 | 0 | 18 | 1.000 | 3.000 | 1.611 | 0.778 |
| GCE96574.1      | 18 | 0 | 18 | 1.000 | 4.000 | 2.056 | 1.211 |
| GCE96598.1      | 18 | 0 | 18 | 1.000 | 3.000 | 1.889 | 0.900 |
| GCE96775.1      | 18 | 0 | 18 | 1.000 | 3.000 | 1.444 | 0.784 |
| GCE96823.1      | 18 | 0 | 18 | 1.000 | 3.000 | 1.444 | 0.784 |
| GCE96829.1      | 18 | 0 | 18 | 1.000 | 4.000 | 2.222 | 1.114 |
| GCE96857.1      | 18 | 0 | 18 | 1.000 | 3.000 | 1.889 | 0.900 |
| GCL44348.1      | 18 | 0 | 18 | 1.000 | 3.000 | 1.889 | 0.900 |
| GCL44353.1      | 18 | 0 | 18 | 1.000 | 4.000 | 2.222 | 1.060 |
| GCL44552.1      | 18 | 0 | 18 | 1.000 | 3.000 | 1.444 | 0.784 |
| GCL44933.1      | 18 | 0 | 18 | 1.000 | 3.000 | 1.444 | 0.784 |
| GCL44962.1      | 18 | 0 | 18 | 1.000 | 3.000 | 1.444 | 0.784 |
| GCL45216.1      | 18 | 0 | 18 | 1.000 | 3.000 | 1.444 | 0.784 |
| GCL45642.1      | 18 | 0 | 18 | 1.000 | 3.000 | 1.889 | 0.900 |
| GCL45761.1 (+1) | 18 | 0 | 18 | 1.000 | 3.000 | 1.444 | 0.784 |
| GCL46121.1      | 18 | 0 | 18 | 1.000 | 3.000 | 1.444 | 0.784 |

|            |    |   |    |       |       |       |       |
|------------|----|---|----|-------|-------|-------|-------|
| GCL46670.1 | 18 | 0 | 18 | 1.000 | 3.000 | 1.611 | 0.778 |
| GCL46949.1 | 18 | 0 | 18 | 1.000 | 3.000 | 1.444 | 0.784 |
| GCL46959.1 | 18 | 0 | 18 | 1.000 | 4.000 | 2.056 | 1.162 |
| GCL47232.1 | 18 | 0 | 18 | 1.000 | 3.000 | 1.944 | 0.873 |
| GCL48436.1 | 18 | 0 | 18 | 1.000 | 4.000 | 2.056 | 1.211 |
| GCL48484.1 | 18 | 0 | 18 | 1.000 | 4.000 | 2.056 | 1.211 |
| GCL48505.1 | 18 | 0 | 18 | 0.000 | 4.000 | 1.444 | 0.922 |
| GCL48514.1 | 18 | 0 | 18 | 0.000 | 3.000 | 1.500 | 0.985 |
| GCL48555.1 | 18 | 0 | 18 | 0.000 | 3.000 | 1.611 | 0.916 |
| GCL48566.1 | 18 | 0 | 18 | 0.000 | 5.000 | 1.556 | 1.149 |
| GCL48572.1 | 18 | 0 | 18 | 0.000 | 4.000 | 1.444 | 0.922 |
| GCL48589.1 | 18 | 0 | 18 | 0.000 | 5.000 | 2.444 | 1.338 |
| GCL48597.1 | 18 | 0 | 18 | 0.000 | 4.000 | 1.611 | 1.145 |
| GCL48598.1 | 18 | 0 | 18 | 0.000 | 4.000 | 1.389 | 0.979 |
| GCL48599.1 | 18 | 0 | 18 | 0.000 | 6.000 | 2.611 | 2.062 |
| GCL48667.1 | 18 | 0 | 18 | 0.000 | 5.000 | 1.556 | 1.199 |
| GCL48737.1 | 18 | 0 | 18 | 1.000 | 4.000 | 2.444 | 0.856 |
| GCL48792.1 | 18 | 0 | 18 | 1.000 | 4.000 | 1.444 | 0.856 |
| GCL48859.1 | 18 | 0 | 18 | 0.000 | 5.000 | 2.444 | 1.338 |
| GCL48872.1 | 18 | 0 | 18 | 0.000 | 5.000 | 2.111 | 1.231 |
| GCL48917.1 | 18 | 0 | 18 | 0.000 | 4.000 | 1.389 | 0.916 |
| GCL48920.1 | 18 | 0 | 18 | 0.000 | 5.000 | 2.333 | 1.534 |
| GCL48934.1 | 18 | 0 | 18 | 1.000 | 5.000 | 1.444 | 1.042 |
| GCL48974.1 | 18 | 0 | 18 | 0.000 | 5.000 | 2.000 | 1.455 |
| GCL49010.1 | 18 | 0 | 18 | 0.000 | 5.000 | 1.444 | 1.247 |
| GCL49031.1 | 18 | 0 | 18 | 0.000 | 5.000 | 1.444 | 1.097 |
| GCL49037.1 | 18 | 0 | 18 | 0.000 | 5.000 | 1.500 | 1.200 |
| GCL49110.1 | 18 | 0 | 18 | 0.000 | 4.000 | 1.944 | 0.998 |
| GCL49141.1 | 18 | 0 | 18 | 0.000 | 5.000 | 1.389 | 1.145 |
| GCL49218.1 | 18 | 0 | 18 | 0.000 | 5.000 | 2.500 | 1.654 |
| GCL49253.1 | 18 | 0 | 18 | 0.000 | 6.000 | 3.333 | 1.847 |
| GCL49269.1 | 18 | 0 | 18 | 1.000 | 5.000 | 1.611 | 1.092 |
| GCL49270.1 | 18 | 0 | 18 | 0.000 | 5.000 | 1.944 | 1.162 |
| GCL49272.1 | 18 | 0 | 18 | 1.000 | 5.000 | 2.111 | 1.132 |
| GCL49275.1 | 18 | 0 | 18 | 0.000 | 5.000 | 1.444 | 1.097 |
| GCL49291.1 | 18 | 0 | 18 | 0.000 | 6.000 | 2.056 | 1.552 |
| GCL49327.1 | 18 | 0 | 18 | 1.000 | 4.000 | 2.278 | 1.127 |
| GCL49341.1 | 18 | 0 | 18 | 0.000 | 4.000 | 1.389 | 1.092 |
| GCL49347.1 | 18 | 0 | 18 | 0.000 | 5.000 | 1.778 | 1.166 |
| GCL49355.1 | 18 | 0 | 18 | 0.000 | 4.000 | 1.389 | 0.979 |
| GCL49368.1 | 18 | 0 | 18 | 0.000 | 4.000 | 1.389 | 0.979 |
| GCL49406.1 | 18 | 0 | 18 | 1.000 | 5.000 | 1.611 | 1.092 |
| GCL49431.1 | 18 | 0 | 18 | 1.000 | 4.000 | 1.611 | 0.916 |
| GCL49495.1 | 18 | 0 | 18 | 0.000 | 4.000 | 1.944 | 1.211 |
| GCL49505.1 | 18 | 0 | 18 | 0.000 | 4.000 | 1.444 | 0.984 |
| GCL49511.1 | 18 | 0 | 18 | 1.000 | 5.000 | 1.889 | 1.132 |
| GCL49534.1 | 18 | 0 | 18 | 0.000 | 4.000 | 2.111 | 1.132 |
| GCL49546.1 | 18 | 0 | 18 | 0.000 | 4.000 | 1.778 | 1.003 |
| GCL49615.1 | 18 | 0 | 18 | 1.000 | 3.000 | 1.444 | 0.784 |
| GCL49622.1 | 18 | 0 | 18 | 0.000 | 4.000 | 1.500 | 1.043 |
| GCL49713.1 | 18 | 0 | 18 | 1.000 | 4.000 | 2.389 | 0.979 |
| GCL49725.1 | 18 | 0 | 18 | 1.000 | 4.000 | 1.444 | 0.856 |
| GCL49807.1 | 18 | 0 | 18 | 1.000 | 4.000 | 1.778 | 0.878 |



|            |    |   |    |       |       |       |       |
|------------|----|---|----|-------|-------|-------|-------|
| GCL49811.1 | 18 | 0 | 18 | 1.000 | 3.000 | 1.444 | 0.784 |
| GCL49853.1 | 18 | 0 | 18 | 1.000 | 4.000 | 2.056 | 1.211 |
| GCL49876.1 | 18 | 0 | 18 | 1.000 | 5.000 | 3.056 | 1.305 |
| GCL49937.1 | 18 | 0 | 18 | 1.000 | 3.000 | 2.056 | 0.802 |
| GCL49956.1 | 18 | 0 | 18 | 1.000 | 5.000 | 3.500 | 1.150 |
| GCL49958.1 | 18 | 0 | 18 | 1.000 | 4.000 | 1.889 | 0.963 |
| GCL49990.1 | 18 | 0 | 18 | 1.000 | 4.000 | 2.222 | 1.114 |
| GCL49992.1 | 18 | 0 | 18 | 1.000 | 4.000 | 1.611 | 1.145 |
| GCL50087.1 | 18 | 0 | 18 | 1.000 | 3.000 | 1.889 | 0.900 |
| GCL50116.1 | 18 | 0 | 18 | 1.000 | 3.000 | 1.889 | 0.900 |
| GCL50140.1 | 18 | 0 | 18 | 1.000 | 3.000 | 1.611 | 0.778 |
| GCL50142.1 | 18 | 0 | 18 | 1.000 | 3.000 | 1.611 | 0.778 |
| GCL50164.1 | 18 | 0 | 18 | 1.000 | 3.000 | 1.611 | 0.778 |
| GCL50187.1 | 18 | 0 | 18 | 1.000 | 3.000 | 1.611 | 0.778 |
| GCL50191.1 | 18 | 0 | 18 | 1.000 | 3.000 | 1.889 | 0.900 |
| GCL50220.1 | 18 | 0 | 18 | 1.000 | 4.000 | 1.778 | 1.114 |
| GCL50243.1 | 18 | 0 | 18 | 1.000 | 3.000 | 1.889 | 0.900 |
| GCL50246.1 | 18 | 0 | 18 | 1.000 | 4.000 | 2.056 | 1.211 |
| GCL50247.1 | 18 | 0 | 18 | 1.000 | 3.000 | 1.889 | 0.900 |
| GCL50272.1 | 18 | 0 | 18 | 1.000 | 3.000 | 1.611 | 0.778 |
| GCL50275.1 | 18 | 0 | 18 | 1.000 | 3.000 | 2.056 | 0.802 |
| GCL50277.1 | 18 | 0 | 18 | 1.000 | 3.000 | 1.611 | 0.778 |
| GCL50294.1 | 18 | 0 | 18 | 1.000 | 4.000 | 2.222 | 1.114 |
| GCL50356.1 | 18 | 0 | 18 | 1.000 | 3.000 | 1.444 | 0.784 |
| GCL50371.1 | 18 | 0 | 18 | 1.000 | 3.000 | 1.889 | 0.900 |
| GCL50397.1 | 18 | 0 | 18 | 0.000 | 6.000 | 2.444 | 1.917 |
| GCL50462.1 | 18 | 0 | 18 | 1.000 | 4.000 | 2.278 | 0.895 |
| GCL50477.1 | 18 | 0 | 18 | 1.000 | 4.000 | 2.222 | 1.114 |
| GCL50548.1 | 18 | 0 | 18 | 1.000 | 3.000 | 1.444 | 0.784 |
| GCL50560.1 | 18 | 0 | 18 | 1.000 | 5.000 | 2.333 | 1.455 |
| GCL50589.1 | 18 | 0 | 18 | 1.000 | 4.000 | 2.722 | 0.958 |
| GCL50615.1 | 18 | 0 | 18 | 1.000 | 5.000 | 2.167 | 1.150 |
| GCL50623.1 | 18 | 0 | 18 | 1.000 | 4.000 | 2.056 | 1.162 |
| GCL50649.1 | 18 | 0 | 18 | 1.000 | 7.000 | 2.389 | 1.577 |
| GCL50711.1 | 18 | 0 | 18 | 1.000 | 3.000 | 1.444 | 0.784 |
| GCL50732.1 | 18 | 0 | 18 | 1.000 | 4.000 | 2.056 | 1.211 |
| GCL50734.1 | 18 | 0 | 18 | 1.000 | 4.000 | 2.722 | 0.895 |
| GCL50769.1 | 18 | 0 | 18 | 1.000 | 3.000 | 1.611 | 0.778 |
| GCL50795.1 | 18 | 0 | 18 | 1.000 | 4.000 | 1.778 | 1.114 |
| GCL50796.1 | 18 | 0 | 18 | 1.000 | 5.000 | 2.167 | 1.543 |
| GCL50816.1 | 18 | 0 | 18 | 1.000 | 3.000 | 1.611 | 0.778 |
| GCL50870.1 | 18 | 0 | 18 | 1.000 | 3.000 | 2.111 | 0.900 |
| GCL50871.1 | 18 | 0 | 18 | 1.000 | 5.000 | 1.611 | 1.195 |
| GCL50879.1 | 18 | 0 | 18 | 1.000 | 3.000 | 2.056 | 0.873 |
| GCL50889.1 | 18 | 0 | 18 | 1.000 | 4.000 | 1.444 | 0.856 |
| GCL50932.1 | 18 | 0 | 18 | 0.000 | 4.000 | 2.111 | 1.132 |
| GCL50957.1 | 18 | 0 | 18 | 1.000 | 3.000 | 1.444 | 0.784 |
| GCL50963.1 | 18 | 0 | 18 | 1.000 | 4.000 | 2.556 | 1.294 |
| GCL50966.1 | 18 | 0 | 18 | 1.000 | 3.000 | 1.444 | 0.784 |
| GCL50970.1 | 18 | 0 | 18 | 0.000 | 5.000 | 2.333 | 1.609 |
| GCL50992.1 | 18 | 0 | 18 | 1.000 | 3.000 | 1.889 | 0.900 |
| GCL51032.1 | 18 | 0 | 18 | 1.000 | 4.000 | 2.056 | 1.211 |
| GCL51057.1 | 18 | 0 | 18 | 1.000 | 3.000 | 1.611 | 0.778 |

|            |    |   |    |       |        |       |       |
|------------|----|---|----|-------|--------|-------|-------|
| GCL51076.1 | 18 | 0 | 18 | 1.000 | 3.000  | 1.444 | 0.784 |
| GCL51082.1 | 18 | 0 | 18 | 1.000 | 4.000  | 2.056 | 1.211 |
| GCL51114.1 | 18 | 0 | 18 | 1.000 | 3.000  | 1.444 | 0.784 |
| GCL51164.1 | 18 | 0 | 18 | 1.000 | 3.000  | 1.444 | 0.784 |
| GCL51166.1 | 18 | 0 | 18 | 1.000 | 3.000  | 1.889 | 0.900 |
| GCL51228.1 | 18 | 0 | 18 | 1.000 | 3.000  | 1.611 | 0.778 |
| GCL51295.1 | 18 | 0 | 18 | 1.000 | 3.000  | 1.444 | 0.784 |
| GCL51402.1 | 18 | 0 | 18 | 1.000 | 3.000  | 1.444 | 0.784 |
| GCL51409.1 | 18 | 0 | 18 | 1.000 | 3.000  | 1.889 | 0.900 |
| GCL51419.1 | 18 | 0 | 18 | 1.000 | 3.000  | 1.611 | 0.778 |
| GCL51432.1 | 18 | 0 | 18 | 1.000 | 7.000  | 3.778 | 1.896 |
| GCL51467.1 | 18 | 0 | 18 | 1.000 | 3.000  | 1.889 | 0.900 |
| GCL51472.1 | 18 | 0 | 18 | 1.000 | 3.000  | 1.778 | 0.732 |
| GCL51534.1 | 18 | 0 | 18 | 1.000 | 3.000  | 1.444 | 0.784 |
| GCL51537.1 | 18 | 0 | 18 | 1.000 | 3.000  | 1.889 | 0.900 |
| GCL51556.1 | 18 | 0 | 18 | 1.000 | 3.000  | 1.444 | 0.784 |
| GCL51576.1 | 18 | 0 | 18 | 1.000 | 3.000  | 1.611 | 0.778 |
| GCL51588.1 | 18 | 0 | 18 | 1.000 | 3.000  | 1.611 | 0.778 |
| GCL51744.1 | 18 | 0 | 18 | 1.000 | 4.000  | 2.056 | 1.211 |
| GCL51760.1 | 18 | 0 | 18 | 1.000 | 3.000  | 1.611 | 0.778 |
| GCL51774.1 | 18 | 0 | 18 | 1.000 | 3.000  | 1.444 | 0.784 |
| GCL51779.1 | 18 | 0 | 18 | 1.000 | 3.000  | 1.444 | 0.784 |
| GCL51811.1 | 18 | 0 | 18 | 2.000 | 11.000 | 6.778 | 3.541 |
| GCL51834.1 | 18 | 0 | 18 | 1.000 | 3.000  | 1.444 | 0.784 |
| GCL51860.1 | 18 | 0 | 18 | 1.000 | 3.000  | 1.444 | 0.784 |
| GCL51885.1 | 18 | 0 | 18 | 1.000 | 4.000  | 2.389 | 1.145 |
| GCL51909.1 | 18 | 0 | 18 | 1.000 | 4.000  | 2.111 | 1.023 |
| GCL51911.1 | 18 | 0 | 18 | 1.000 | 4.000  | 2.222 | 1.114 |
| GCL51955.1 | 18 | 0 | 18 | 1.000 | 5.000  | 2.500 | 1.465 |
| GCL51973.1 | 18 | 0 | 18 | 1.000 | 4.000  | 1.778 | 1.114 |
| GCL51984.1 | 18 | 0 | 18 | 1.000 | 4.000  | 1.611 | 1.145 |
| GCL51985.1 | 18 | 0 | 18 | 1.000 | 3.000  | 1.444 | 0.784 |
| GCL52006.1 | 18 | 0 | 18 | 1.000 | 3.000  | 1.444 | 0.784 |
| GCL52010.1 | 18 | 0 | 18 | 1.000 | 3.000  | 1.444 | 0.784 |
| GCL52032.1 | 18 | 0 | 18 | 1.000 | 3.000  | 1.444 | 0.784 |
| GCL52091.1 | 18 | 0 | 18 | 0.000 | 3.000  | 1.389 | 0.850 |
| GCL52103.1 | 18 | 0 | 18 | 1.000 | 3.000  | 1.889 | 0.900 |
| GCL52174.1 | 18 | 0 | 18 | 1.000 | 3.000  | 1.611 | 0.778 |
| GCL52209.1 | 18 | 0 | 18 | 1.000 | 4.000  | 1.611 | 1.145 |
| GCL52256.1 | 18 | 0 | 18 | 1.000 | 5.000  | 2.056 | 1.305 |
| GCL52307.1 | 18 | 0 | 18 | 1.000 | 4.000  | 1.778 | 1.003 |
| GCL52373.1 | 18 | 0 | 18 | 1.000 | 3.000  | 1.889 | 0.900 |
| GCL52402.1 | 18 | 0 | 18 | 1.000 | 3.000  | 1.444 | 0.784 |
| GCL52445.1 | 18 | 0 | 18 | 1.000 | 3.000  | 1.611 | 0.778 |
| GCL52530.1 | 18 | 0 | 18 | 0.000 | 3.000  | 1.556 | 0.856 |
| GCL52551.1 | 18 | 0 | 18 | 1.000 | 4.000  | 1.611 | 0.850 |
| GCL52553.1 | 18 | 0 | 18 | 0.000 | 3.000  | 1.389 | 0.916 |
| GCL52629.1 | 18 | 0 | 18 | 1.000 | 3.000  | 1.778 | 0.732 |
| GCL52800.1 | 18 | 0 | 18 | 1.000 | 4.000  | 2.056 | 1.162 |
| GCL52835.1 | 18 | 0 | 18 | 0.000 | 3.000  | 1.389 | 0.850 |
| GCL52956.1 | 18 | 0 | 18 | 1.000 | 3.000  | 1.444 | 0.784 |
| GCL52972.1 | 18 | 0 | 18 | 0.000 | 4.000  | 2.000 | 1.237 |
| GCL53135.1 | 18 | 0 | 18 | 1.000 | 4.000  | 1.778 | 1.114 |

|                 |    |   |    |       |        |       |       |
|-----------------|----|---|----|-------|--------|-------|-------|
| GCL53315.1      | 18 | 0 | 18 | 1.000 | 3.000  | 1.611 | 0.778 |
| GCL53423.1      | 18 | 0 | 18 | 1.000 | 3.000  | 1.778 | 0.943 |
| GCL53432.1      | 18 | 0 | 18 | 0.000 | 6.000  | 2.333 | 1.749 |
| GCL54043.1      | 18 | 0 | 18 | 1.000 | 3.000  | 1.444 | 0.784 |
| GCL54088.1      | 18 | 0 | 18 | 1.000 | 3.000  | 1.889 | 0.900 |
| GCL54123.1      | 18 | 0 | 18 | 1.000 | 3.000  | 1.444 | 0.784 |
| GCL54137.1      | 18 | 0 | 18 | 1.000 | 3.000  | 1.444 | 0.784 |
| GCL54257.1      | 18 | 0 | 18 | 1.000 | 4.000  | 2.556 | 0.984 |
| GCL54297.1      | 18 | 0 | 18 | 1.000 | 5.000  | 1.444 | 1.042 |
| GCL54360.1      | 18 | 0 | 18 | 1.000 | 4.000  | 2.222 | 1.114 |
| GCL54440.1      | 18 | 0 | 18 | 1.000 | 3.000  | 1.611 | 0.778 |
| GCL54469.1      | 18 | 0 | 18 | 1.000 | 3.000  | 1.444 | 0.784 |
| GCL54487.1      | 18 | 0 | 18 | 1.000 | 3.000  | 1.444 | 0.784 |
| GCL54821.1      | 18 | 0 | 18 | 1.000 | 3.000  | 1.611 | 0.778 |
| GCL54996.1 (+1) | 18 | 0 | 18 | 1.000 | 5.000  | 1.778 | 1.517 |
| GCL55041.1      | 18 | 0 | 18 | 1.000 | 3.000  | 1.444 | 0.784 |
| GCL55246.1      | 18 | 0 | 18 | 2.000 | 4.000  | 2.722 | 0.752 |
| GCL55249.1      | 18 | 0 | 18 | 1.000 | 4.000  | 1.611 | 1.145 |
| GCL55361.1      | 18 | 0 | 18 | 1.000 | 6.000  | 1.611 | 1.335 |
| GCL55369.1      | 18 | 0 | 18 | 1.000 | 5.000  | 2.333 | 1.455 |
| GCL55509.1      | 18 | 0 | 18 | 1.000 | 3.000  | 1.500 | 0.786 |
| GCL55544.1      | 18 | 0 | 18 | 1.000 | 4.000  | 2.056 | 1.211 |
| GCL55554.1      | 18 | 0 | 18 | 1.000 | 3.000  | 1.611 | 0.778 |
| GCL55567.1      | 18 | 0 | 18 | 1.000 | 4.000  | 1.444 | 0.856 |
| GCL55691.1      | 18 | 0 | 18 | 1.000 | 4.000  | 2.389 | 0.979 |
| GCL55791.1      | 18 | 0 | 18 | 1.000 | 3.000  | 1.500 | 0.786 |
| GCL55796.1      | 18 | 0 | 18 | 1.000 | 3.000  | 1.444 | 0.784 |
| GCL55834.1      | 18 | 0 | 18 | 1.000 | 3.000  | 1.444 | 0.784 |
| GCL55919.1      | 18 | 0 | 18 | 1.000 | 4.000  | 2.222 | 1.114 |
| GCL55921.1      | 18 | 0 | 18 | 1.000 | 4.000  | 1.889 | 1.023 |
| GCL55992.1      | 18 | 0 | 18 | 1.000 | 4.000  | 1.944 | 1.110 |
| GCL56109.1      | 18 | 0 | 18 | 1.000 | 3.000  | 1.444 | 0.784 |
| GCL56355.1      | 18 | 0 | 18 | 1.000 | 4.000  | 1.944 | 1.056 |
| GCL56477.1      | 18 | 0 | 18 | 1.000 | 4.000  | 3.056 | 1.162 |
| GCL56478.1      | 18 | 0 | 18 | 1.000 | 6.000  | 2.611 | 1.650 |
| GCL56723.1      | 18 | 0 | 18 | 1.000 | 3.000  | 1.778 | 0.732 |
| GCL56838.1      | 18 | 0 | 18 | 1.000 | 3.000  | 1.444 | 0.784 |
| GCL57440.1      | 18 | 0 | 18 | 1.000 | 3.000  | 1.611 | 0.778 |
| GCL57442.1      | 18 | 0 | 18 | 1.000 | 3.000  | 1.889 | 0.900 |
| GCL58385.1      | 18 | 0 | 18 | 1.000 | 3.000  | 1.611 | 0.778 |
| GCL58853.1      | 18 | 0 | 18 | 1.000 | 3.000  | 1.444 | 0.784 |
| GCL58939.1      | 18 | 0 | 18 | 1.000 | 4.000  | 2.222 | 1.114 |
| GCL59014.1      | 18 | 0 | 18 | 1.000 | 3.000  | 1.444 | 0.784 |
| GCL59050.1      | 18 | 0 | 18 | 1.000 | 11.000 | 2.944 | 3.351 |
| GCL59051.1      | 18 | 0 | 18 | 1.000 | 3.000  | 1.611 | 0.778 |
| GCL59281.1      | 18 | 0 | 18 | 1.000 | 3.000  | 2.056 | 0.802 |
| GCL59779.1      | 18 | 0 | 18 | 1.000 | 7.000  | 2.111 | 2.272 |
| GCL59897.1      | 18 | 0 | 18 | 1.000 | 3.000  | 1.444 | 0.784 |
| GCL60054.1      | 18 | 0 | 18 | 1.000 | 4.000  | 2.056 | 1.211 |
| GCL60156.1      | 18 | 0 | 18 | 1.000 | 4.000  | 2.389 | 0.979 |
| GCL60619.1      | 18 | 0 | 18 | 1.000 | 3.000  | 1.889 | 0.900 |
| GCL60907.1      | 18 | 0 | 18 | 1.000 | 4.000  | 2.222 | 1.114 |
| RAQ38716.1      | 18 | 0 | 18 | 1.000 | 3.000  | 1.444 | 0.784 |

|                     |    |   |    |       |       |       |       |
|---------------------|----|---|----|-------|-------|-------|-------|
| RAQ38817.1          | 18 | 0 | 18 | 1.000 | 3.000 | 1.611 | 0.778 |
| RAQ38879.1          | 18 | 0 | 18 | 1.000 | 4.000 | 2.056 | 1.211 |
| RAQ38927.1          | 18 | 0 | 18 | 1.000 | 4.000 | 1.778 | 1.114 |
| RAQ39425.1          | 18 | 0 | 18 | 1.000 | 4.000 | 2.111 | 1.023 |
| RAQ39445.1          | 18 | 0 | 18 | 1.000 | 3.000 | 1.611 | 0.778 |
| RAQ39680.1          | 18 | 0 | 18 | 1.000 | 3.000 | 1.611 | 0.778 |
| RAQ39932.1          | 18 | 0 | 18 | 0.000 | 3.000 | 1.389 | 0.850 |
| RAQ40164.1          | 18 | 0 | 18 | 1.000 | 3.000 | 1.611 | 0.778 |
| RAQ40448.1          | 18 | 0 | 18 | 1.000 | 3.000 | 1.444 | 0.784 |
| RAQ40522.1          | 18 | 0 | 18 | 1.000 | 4.000 | 1.444 | 0.856 |
| RAQ40775.1          | 18 | 0 | 18 | 1.000 | 3.000 | 1.889 | 0.900 |
| RAQ41462.1          | 18 | 0 | 18 | 1.000 | 4.000 | 2.556 | 1.294 |
| RAQ42577.1          | 18 | 0 | 18 | 1.000 | 3.000 | 1.444 | 0.784 |
| RAQ42588.1          | 18 | 0 | 18 | 1.000 | 3.000 | 1.444 | 0.784 |
| RAQ43317.1          | 18 | 0 | 18 | 1.000 | 4.000 | 2.222 | 1.114 |
| RAQ43332.1          | 18 | 0 | 18 | 1.000 | 3.000 | 1.444 | 0.784 |
| RAQ44173.1          | 18 | 0 | 18 | 1.000 | 4.000 | 3.056 | 1.162 |
| RAQ45356.1          | 18 | 0 | 18 | 1.000 | 3.000 | 1.611 | 0.778 |
| RAQ45823.1          | 18 | 0 | 18 | 1.000 | 3.000 | 1.444 | 0.784 |
| RAQ45915.1          | 18 | 0 | 18 | 1.000 | 3.000 | 1.444 | 0.784 |
| RAQ46741.1          | 18 | 0 | 18 | 1.000 | 4.000 | 2.222 | 0.732 |
| RAQ46791.1          | 18 | 0 | 18 | 1.000 | 4.000 | 2.722 | 1.074 |
| RAQ47004.1          | 18 | 0 | 18 | 1.000 | 3.000 | 1.444 | 0.784 |
| RAQ47071.1          | 18 | 0 | 18 | 1.000 | 4.000 | 2.056 | 1.162 |
| RAQ47232.1          | 18 | 0 | 18 | 1.000 | 4.000 | 2.222 | 1.114 |
| RAQ47549.1          | 18 | 0 | 18 | 2.000 | 5.000 | 3.056 | 1.162 |
| RAQ47585.1          | 18 | 0 | 18 | 1.000 | 3.000 | 1.944 | 0.873 |
| RAQ47850.1          | 18 | 0 | 18 | 1.000 | 4.000 | 2.222 | 1.114 |
| RAQ48331.1          | 18 | 0 | 18 | 1.000 | 3.000 | 2.222 | 0.878 |
| RAQ48378.1          | 18 | 0 | 18 | 1.000 | 3.000 | 1.944 | 0.802 |
| RAQ48678.1          | 18 | 0 | 18 | 1.000 | 3.000 | 1.889 | 0.900 |
| RAQ48988.1          | 18 | 0 | 18 | 1.000 | 5.000 | 2.333 | 1.455 |
| RAQ49094.1          | 18 | 0 | 18 | 1.000 | 5.000 | 2.667 | 1.188 |
| SMN23020.1          | 18 | 0 | 18 | 1.000 | 5.000 | 2.500 | 1.425 |
| SMN35232.1          | 18 | 0 | 18 | 1.000 | 3.000 | 1.444 | 0.784 |
| SMN35255.1          | 18 | 0 | 18 | 1.000 | 5.000 | 2.556 | 1.247 |
| SMN35259.1          | 18 | 0 | 18 | 1.000 | 3.000 | 1.611 | 0.778 |
| SPD79481.1          | 18 | 0 | 18 | 1.000 | 3.000 | 1.444 | 0.784 |
| tr A0A2N9DMR0 A0A2  | 18 | 0 | 18 | 1.000 | 3.000 | 1.444 | 0.784 |
| tr A0A2N9DMR5 A0A2  | 18 | 0 | 18 | 1.000 | 4.000 | 2.111 | 1.023 |
| tr H1W8U7 H1W8U7_90 | 18 | 0 | 18 | 1.000 | 4.000 | 1.611 | 1.145 |
| TVU52697.1          | 18 | 0 | 18 | 1.000 | 4.000 | 2.056 | 1.211 |
| TVU52963.1          | 18 | 0 | 18 | 1.000 | 4.000 | 1.778 | 1.114 |
| TVU53417.1          | 18 | 0 | 18 | 0.000 | 3.000 | 1.500 | 0.924 |
| TVU53586.1          | 18 | 0 | 18 | 1.000 | 3.000 | 1.611 | 0.778 |
| TVU53692.1          | 18 | 0 | 18 | 1.000 | 4.000 | 1.611 | 1.145 |
| TVU54284.1          | 18 | 0 | 18 | 1.000 | 3.000 | 1.444 | 0.784 |
| TVU54640.1          | 18 | 0 | 18 | 1.000 | 5.000 | 1.833 | 1.295 |
| TVU55119.1          | 18 | 0 | 18 | 0.000 | 4.000 | 1.833 | 1.200 |
| TVU55427.1          | 18 | 0 | 18 | 1.000 | 3.000 | 1.611 | 0.778 |
| VIP01172.1          | 18 | 0 | 18 | 0.000 | 3.000 | 1.556 | 0.856 |
| VIP01439.1          | 18 | 0 | 18 | 1.000 | 3.000 | 1.444 | 0.784 |
| VIP01757.1          | 18 | 0 | 18 | 1.000 | 3.000 | 1.444 | 0.784 |

|                |    |   |    |       |        |       |       |
|----------------|----|---|----|-------|--------|-------|-------|
| VIP01864.1     | 18 | 0 | 18 | 1.000 | 6.000  | 2.444 | 1.977 |
| VIP03226.1     | 18 | 0 | 18 | 1.000 | 4.000  | 2.222 | 1.060 |
| VIP03488.1     | 18 | 0 | 18 | 1.000 | 3.000  | 1.611 | 0.778 |
| VIP03920.1     | 18 | 0 | 18 | 1.000 | 3.000  | 1.444 | 0.784 |
| VTR91003.1     | 18 | 0 | 18 | 1.000 | 3.000  | 1.889 | 0.900 |
| VTR92413.1     | 18 | 0 | 18 | 1.000 | 3.000  | 1.444 | 0.784 |
| VTR92436.1     | 18 | 0 | 18 | 1.000 | 3.000  | 2.056 | 0.802 |
| VTR92544.1     | 18 | 0 | 18 | 1.000 | 3.000  | 1.778 | 0.943 |
| VTR93808.1     | 18 | 0 | 18 | 1.000 | 4.000  | 2.222 | 1.114 |
| VTR94017.1     | 18 | 0 | 18 | 1.000 | 5.000  | 2.500 | 1.339 |
| VTR94710.1     | 18 | 0 | 18 | 1.000 | 3.000  | 1.444 | 0.784 |
| VTR96031.1     | 18 | 0 | 18 | 1.000 | 4.000  | 2.111 | 1.023 |
| VTR96211.1     | 18 | 0 | 18 | 1.000 | 4.000  | 2.056 | 1.211 |
| VTR96478.1     | 18 | 0 | 18 | 2.000 | 6.000  | 3.667 | 1.283 |
| VTR97771.1     | 18 | 0 | 18 | 1.000 | 4.000  | 2.389 | 0.979 |
| VTR98805.1     | 18 | 0 | 18 | 1.000 | 6.000  | 1.944 | 1.514 |
| VTR99319.1     | 18 | 0 | 18 | 1.000 | 3.000  | 1.889 | 0.900 |
| VT000916.1     | 18 | 0 | 18 | 1.000 | 5.000  | 2.333 | 1.188 |
| VT001204.1     | 18 | 0 | 18 | 1.000 | 4.000  | 1.944 | 1.056 |
| VT002576.1     | 18 | 0 | 18 | 1.000 | 5.000  | 2.444 | 1.580 |
| VT003217.1     | 18 | 0 | 18 | 1.000 | 3.000  | 1.444 | 0.784 |
| VT006586.1     | 18 | 0 | 18 | 1.000 | 3.000  | 2.056 | 0.802 |
| VT009788.1     | 18 | 0 | 18 | 1.000 | 6.000  | 3.056 | 1.765 |
| VT010391.1     | 18 | 0 | 18 | 1.000 | 3.000  | 1.444 | 0.784 |
| VT010439.1     | 18 | 0 | 18 | 1.000 | 3.000  | 2.056 | 0.802 |
| VT010532.1     | 18 | 0 | 18 | 1.000 | 3.000  | 2.278 | 0.575 |
| VT011136.1     | 18 | 0 | 18 | 1.000 | 3.000  | 1.944 | 0.873 |
| VT011826.1     | 18 | 0 | 18 | 1.000 | 3.000  | 1.444 | 0.784 |
| VT012076.1     | 18 | 0 | 18 | 1.000 | 3.000  | 1.944 | 0.873 |
| VT098366.1     | 18 | 0 | 18 | 1.000 | 5.000  | 2.444 | 1.580 |
| VT099252.1     | 18 | 0 | 18 | 1.000 | 3.000  | 1.444 | 0.784 |
| VT099839.1     | 18 | 0 | 18 | 2.000 | 10.000 | 5.722 | 2.845 |
| VTU00757.1     | 18 | 0 | 18 | 1.000 | 3.000  | 1.444 | 0.784 |
| VTU01064.1     | 18 | 0 | 18 | 0.000 | 4.000  | 2.222 | 1.309 |
| VTU01302.1     | 18 | 0 | 18 | 1.000 | 3.000  | 1.444 | 0.784 |
| VTU01377.1     | 18 | 0 | 18 | 0.000 | 3.000  | 1.444 | 0.856 |
| VTU01600.1     | 18 | 0 | 18 | 1.000 | 4.000  | 2.556 | 1.042 |
| VTU01960.1     | 18 | 0 | 18 | 1.000 | 5.000  | 1.611 | 1.195 |
| WP_046320831.1 | 18 | 0 | 18 | 1.000 | 6.000  | 1.611 | 1.335 |
| WP_046320891.1 | 18 | 0 | 18 | 1.000 | 4.000  | 1.389 | 0.850 |
| WP_046321251.1 | 18 | 0 | 18 | 1.000 | 5.000  | 1.722 | 1.127 |
| WP_052741562.1 | 18 | 0 | 18 | 1.000 | 3.000  | 1.278 | 0.575 |
| WP_084831741.1 | 18 | 0 | 18 | 1.000 | 4.000  | 2.222 | 1.114 |
| WP_084831749.1 | 18 | 0 | 18 | 1.000 | 3.000  | 1.444 | 0.784 |
| WP_108614728.1 | 18 | 0 | 18 | 1.000 | 3.000  | 1.444 | 0.784 |
| WP_108614978.1 | 18 | 0 | 18 | 1.000 | 3.000  | 1.444 | 0.784 |
| YP_005098423.1 | 18 | 0 | 18 | 1.000 | 3.000  | 2.111 | 0.758 |
